# Supplementary material for: ClbR Is the Key Transcriptional Activator of Colibactin Gene Expression in Escherichia coli
Source: PubMed Central journal article supplement (PMC7364221; doi:10.1128/msphere.00591-20), 2020-07-15
Supplement: mSphere.00591-20-sf002.pdf [file mSphere.00591-20-sf002.pdf]

**A**

```
C1bR  MGGNMDKFKEKNPLSLRERQVLRMLAQGDEYSQISHNLNISINTVKFHVKNIKHKIQARNTNHAIHIANR-NEII- 74
GerE  --MKEKEFQSKPLLTKREREFVLELVQDKTTKEIASELFISEKTVRNHISNAMQKLGVKGRSQAVVELLRMGELEL 74
      :.:*:* *:*:***:*.:.*. .:.*: * * *:*: *:. * :*: :.:.:.*: * .*:
```

**B**

```
1      10      20      30      40      50      60      70
MGGNMDKFKEKNPLSLRERQVLRMLAQGDEYSQISHNLNISINTVKFHVKNIKHKIQARNTNHAIHIANRNEII
-----HHHHHHHHHHHH-----HHHHHHHH-----HHHHHHHHHHHHHH-----HHHHHHHHHH-----
```

**C**

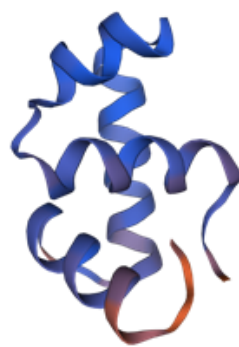

C1bR

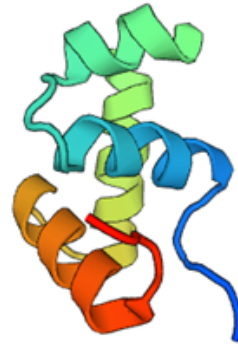

GerE
