# Supplementary material for: ClbR Is the Key Transcriptional Activator of Colibactin Gene Expression in Escherichia coli
Source: PubMed Central journal article supplement (PMC7364221; doi:10.1128/msphere.00591-20), 2020-07-15

**A**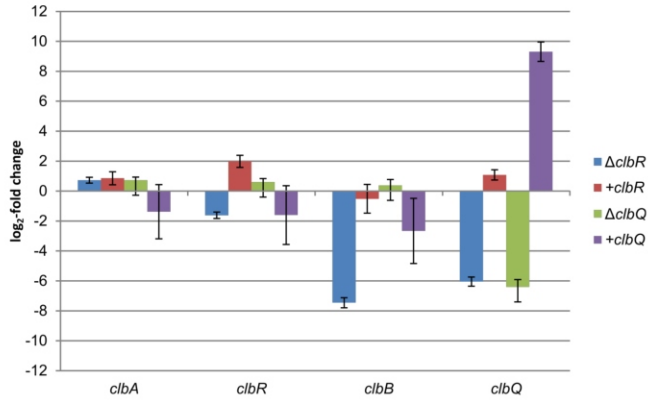**B**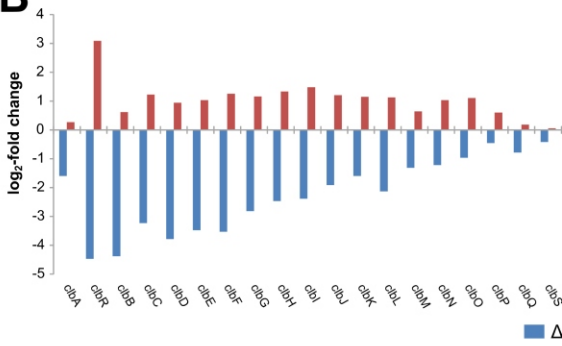**C**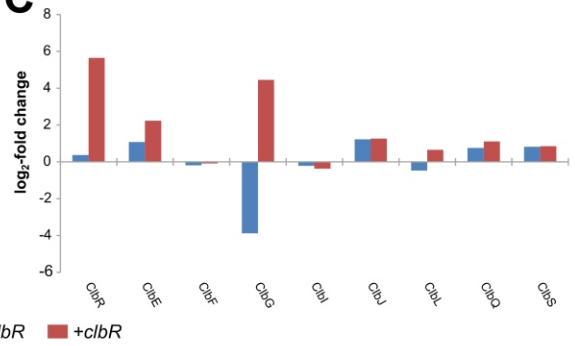**D**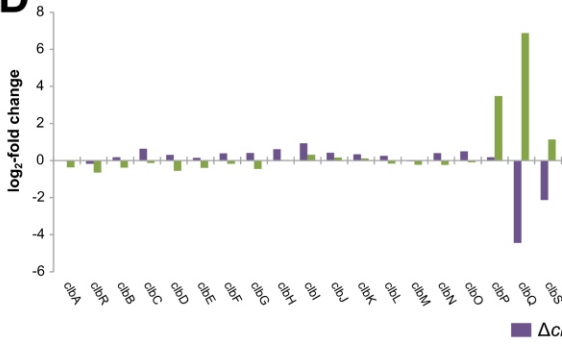**E**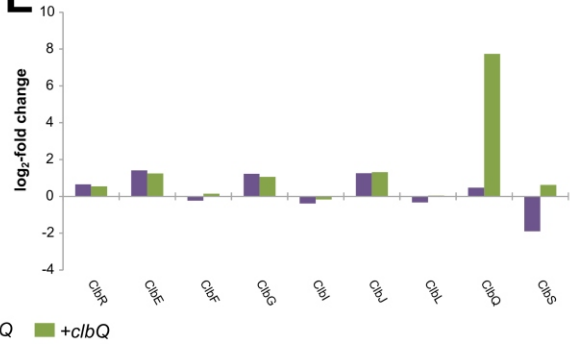

Supplement: mSphere.00591-20-sf006.pdf [file mSphere.00591-20-sf006.pdf]
