# Supplementary material for: ClbR Is the Key Transcriptional Activator of Colibactin Gene Expression in Escherichia coli
Source: PubMed Central journal article supplement (PMC7364221; doi:10.1128/msphere.00591-20), 2020-07-15
Supplement: mSphere.00591-20-st001.pdf [file mSphere.00591-20-st001.pdf]

**Table S1:** Fitness-related determinants of fecal isolate *E. coli* M1/5

| Category                    | Gene identifier                          | Function                                                         |
|-----------------------------|------------------------------------------|------------------------------------------------------------------|
| <b>Adhesins</b>             | HLK60_20945 – HLK60_20910                | Type 1 fimbriae ( <i>fimEAICDFGH</i> )                           |
|                             | HLK_60_01445 - HLK_60_01475              | Auf fimbriae ( <i>aufABCDEFGF</i> )                              |
|                             | HLK_60_03095 - HLK_60_03110              | CFA/I-like fimbriae ( <i>cfaABCE</i> )                           |
|                             | HLK_60_18795 - HLK_60_18820              | Ecp / Mat fimbriae ( <i>yagZYXWV</i> )                           |
|                             | HLK_60_19730 - HLK_60_19760              | Yad fimbriae ( <i>yadCKLM, htrE, ecpD, yadN</i> )                |
|                             | HLK_60_08350 - HLK_60_08365              | Yeh fimbriae ( <i>yehABCD</i> )                                  |
|                             | HLK_60_07240 - HLK_60_07270              | Yfc fimbriae ( <i>yfcVUTSRQPO</i> )                              |
|                             | HLK_60_12065 - HLK_60_12085              | Yde fimbriae ( <i>ydeQRST</i> )                                  |
|                             | HLK_60_15355 - HLK_60_15385              | Curli fimbriae ( <i>csgCABDEFG</i> )                             |
|                             | <b>T2SS</b>                              | HLK_60_01920 - HLK_60_01985                                      |
| HLK_60_03820 - HLK_60_03885 |                                          | ( <i>gspOMLKJIHGFEDCA; yghJ, pppA, gspCDEFGHIJKLM, yghG</i> )    |
| <b>T5SS</b>                 | HLK_60_04040                             | Autotransporter adhesion antigen 43 (Flu)                        |
|                             | HLK_60_18670                             | Autotransporter adhesins UpaB, UpaH, UpaI, UpaJ                  |
|                             | HLK_60_12535                             |                                                                  |
|                             | HLK_60_07750                             |                                                                  |
|                             | HLK_60_00525                             |                                                                  |
|                             | HLK_60_04220                             | Serine autotransporter protease Sat                              |
|                             | HLK_60_18850                             | Vacuolating autotransporter toxin Vat                            |
| HLK_60_25200                | Putative serine autotransporter protease |                                                                  |
| <b>T6SS</b>                 | HLK_60_05060 - HLK_60_05170              | T6SS-2 subtype i2                                                |
|                             | HLK_60_19205 - HLK_60_19340              | T6SS-1 subtype i1 and additional                                 |
|                             | HLK_60_12265                             | Vgr-family proteins                                              |
|                             | HLK_60_12300                             |                                                                  |
| <b>Iron uptake systems</b>  | HLK_60_04320 - HLK_60_04255              | Aerobactin biosynthesis – ShiF major facilitator gene cluster I  |
|                             | HLK_60_25025 - HLK_60_25050              | Aerobactin biosynthesis – ShiF major facilitator gene cluster II |
|                             | HLK_60_09280 - HLK_60_09330              | Yersiniabactin biosynthesis                                      |
|                             | HLK_60_04160                             | Bifunctional enterobactin receptor/adhesin protein Iha           |
|                             | HLK_60_01045 - HLK_60_01080              | Hemin uptake ( <i>hmuV, chuUYXWTAD</i> )                         |
|                             | HLK_60_15455 - HLK_60_15445              | Ferrous low pH iron transport ( <i>efeUOB</i> )                  |
|                             | HLK_60_17405 - HLK_60_17425              | Enterobactin biosynthesis/transport                              |
|                             | HLK_60_17455 - HLK_60_17480              |                                                                  |
|                             | HLK_60_16435                             |                                                                  |
|                             | HLK_60_21035 - HLK_60_21065              | Ferric citrate transport ( <i>fecIRABCDE</i> )                   |
| HLK_60_01580 - HLK_60_01575 | ferrous iron transport ( <i>feoAB</i> )  |                                                                  |

**Other**

|                              |                                                                 |
|------------------------------|-----------------------------------------------------------------|
| HLK_60_19670 - HLK_60_19685  | Ferrichrome iron transport                                      |
| HLK_60_03465 - HLK_60_03490  | ( <i>fhuBDCA</i> ; <i>fitABCDER</i> )                           |
| HLK_60_14430 - HLK_60_14445  | Ferrous iron/manganese transport system I ( <i>sitABCD</i> )    |
| HLK_60_25115 - HLK_60_25130  | Ferrous iron/manganese transport system II ( <i>sitABCD</i> )   |
| HLK_60_09070                 | Heme receptor Hma                                               |
| HLK_60_09115 - HLK_60_09205  | Colibactin biosynthesis ( <i>clbARBCDEFGHIJKLMNOPQS</i> )       |
| HLK_60_03890 - HLK_60_03955  | K5 capsule ( <i>kpsMT</i> , <i>kfiABCD</i> , <i>kpsSCUDEF</i> ) |
| HLK_60_15725                 | Outer membrane protein A                                        |
| HLK_60_17620                 | Outer membrane protease OmpT, omptin                            |
| HLK_60_09840 - HLK_60_09990; | Flag-1 flagellar system                                         |
| HLK_60_10125 - HLK_60_10195; |                                                                 |
| HLK_60_15160 - HLK_60_15225  |                                                                 |
| HLK_60_18935 - HLK_60_19150  | Flag-2 flagellar system                                         |
| HLK_60_08130                 | Colicin 1 receptor CirA                                         |
| HLK_60_07365                 | Colicin V production protein                                    |
| HLK_60_25375                 | Colicin 1A immunity protein                                     |
| HLK_60_25335                 | Complement resistance protein                                   |
|                              | TraT                                                            |

---
