# Supplementary material for: ClbR Is the Key Transcriptional Activator of Colibactin Gene Expression in Escherichia coli
Source: PubMed Central journal article supplement (PMC7364221; doi:10.1128/msphere.00591-20), 2020-07-15
Supplement: mSphere.00591-20-st002.pdf [file mSphere.00591-20-st002.pdf]

**Table S2:** Differentially expressed genes and proteins in *E. coli* M1/5 in response to altered *clbR* or *clbQ* expression.

| Identifier                | Annotation           | M1/5<br><i>rpsLK42R</i><br>$\Delta$ <i>clbR</i><br>(pBAD24) | M1/5<br><i>rpsLK42R</i><br>(pBAD24-<br><i>tetAp-clbR-</i><br><i>rrnBt</i> ) | M1/5<br><i>rpsLK42R</i><br>$\Delta$ <i>clbQ</i><br>(pBAD24) | M1/5<br><i>rpsLK42R</i><br>(pBAD24-<br><i>tetAp-clbQ-</i><br><i>rrnBt</i> ) |
|---------------------------|----------------------|-------------------------------------------------------------|-----------------------------------------------------------------------------|-------------------------------------------------------------|-----------------------------------------------------------------------------|
| <i>De-regulated Genes</i> |                      |                                                             |                                                                             |                                                             |                                                                             |
| HLK60_20145               | <i>araC</i>          | 0.125                                                       | -1.900                                                                      | 0.876                                                       | -3.206                                                                      |
| HLK60_06095               | <i>aroF</i>          | 1.597                                                       | 2.000                                                                       | 1.980                                                       | 1.694                                                                       |
| HLK60_09125               | <i>clbB</i>          | -4.381                                                      | 0.613                                                                       | 0.179                                                       | -0.391                                                                      |
| HLK60_09130               | <i>clbC</i>          | -3.236                                                      | 1.222                                                                       | 0.639                                                       | -0.149                                                                      |
| HLK60_09135               | <i>clbD</i>          | -3.794                                                      | 0.935                                                                       | 0.304                                                       | -0.566                                                                      |
| HLK60_09140               | <i>clbE</i>          | -3.482                                                      | 1.029                                                                       | 0.150                                                       | -0.410                                                                      |
| HLK60_09145               | <i>clbF</i>          | -3.536                                                      | 1.245                                                                       | 0.396                                                       | -0.184                                                                      |
| HLK60_09150               | <i>clbG</i>          | -2.820                                                      | 1.157                                                                       | 0.410                                                       | -0.461                                                                      |
| HLK60_09155               | <i>clbH</i>          | -2.470                                                      | 1.330                                                                       | 0.611                                                       | 0.022                                                                       |
| HLK60_09160               | <i>clbI</i>          | -2.388                                                      | 1.474                                                                       | 0.930                                                       | 0.304                                                                       |
| HLK60_09175               | <i>clbL</i>          | -2.133                                                      | 1.120                                                                       | 0.256                                                       | -0.182                                                                      |
| HLK60_09195               | <i>clbP</i>          | -0.455                                                      | 0.600                                                                       | 0.182                                                       | 3.466                                                                       |
| HLK60_09200               | <i>clbQ</i>          | -0.792                                                      | 0.178                                                                       | -4.445                                                      | 6.861                                                                       |
| HLK60_09120               | <i>clbR</i>          | -4.473                                                      | 3.085                                                                       | -0.174                                                      | -0.662                                                                      |
| HLK60_09205               | <i>clbS</i>          | -0.424                                                      | 0.046                                                                       | -2.137                                                      | 1.125                                                                       |
| HLK60_22730               | <i>dgkA</i>          | -0.049                                                      | -2.100                                                                      | -0.699                                                      | -0.392                                                                      |
| HLK60_20655               | <i>fhuF</i>          | -0.177                                                      | -2.769                                                                      | -0.062                                                      | -0.354                                                                      |
| HLK60_19145               | <i>flhB</i>          | -1.848                                                      | 0.544                                                                       | -1.957                                                      | 3.345                                                                       |
| HLK60_09980               | <i>fliA</i>          | -1.405                                                      | -3.264                                                                      | -1.515                                                      | -1.463                                                                      |
| HLK60_08760               | <i>hisA</i>          | -1.506                                                      | -2.991                                                                      | -3.538                                                      | -2.878                                                                      |
| HLK60_08770               | <i>hisB</i>          | -1.853                                                      | -2.605                                                                      | -2.543                                                      | -2.594                                                                      |
| HLK60_08775               | <i>hisC</i>          | -2.286                                                      | -2.889                                                                      | -2.304                                                      | -2.634                                                                      |
| HLK60_08780               | <i>hisD</i>          | -2.135                                                      | -2.553                                                                      | -1.211                                                      | -2.359                                                                      |
| HLK60_08755               | <i>hisF</i>          | -1.005                                                      | -3.016                                                                      | -3.389                                                      | -2.481                                                                      |
| HLK60_08765               | <i>hisH</i>          | -2.293                                                      | -2.974                                                                      | -3.403                                                      | -2.856                                                                      |
| HLK60_00110               | <i>gidH</i>          | -0.920                                                      | -0.078                                                                      | -2.252                                                      | 0.110                                                                       |
| HLK60_00250               | hypothetical protein | 0.917                                                       | 2.129                                                                       | 1.485                                                       | 2.345                                                                       |
| HLK60_03660               | <i>yghW</i>          | -0.533                                                      | -0.815                                                                      | -1.149                                                      | -2.216                                                                      |
| HLK60_08465               | <i>yegR</i>          | -1.653                                                      | -2.382                                                                      | -1.062                                                      | -1.581                                                                      |
| HLK60_08750               | <i>hisI</i>          | -0.347                                                      | -2.550                                                                      | -3.164                                                      | -2.230                                                                      |
| HLK60_08905               | hypothetical protein | 1.765                                                       | 2.451                                                                       | 0.807                                                       | 2.045                                                                       |
| HLK60_09335               | integrase            | 1.180                                                       | -0.456                                                                      | 1.070                                                       | 2.345                                                                       |
| HLK60_09590               | hypothetical protein | -1.990                                                      | -2.041                                                                      | -0.778                                                      | -1.918                                                                      |
| HLK60_12140               | hypothetical protein | -0.458                                                      | -2.246                                                                      | -0.217                                                      | -0.638                                                                      |
| HLK60_12255               | hypothetical protein | -0.405                                                      | 0.544                                                                       | 0.485                                                       | 2.252                                                                       |
| HLK60_13680               | hypothetical protein | -1.493                                                      | -0.843                                                                      | -1.795                                                      | -2.743                                                                      |
| HLK60_14510               | hypothetical protein | -0.331                                                      | -1.382                                                                      | -0.762                                                      | -2.166                                                                      |
| HLK60_18780               | <i>ykgM</i>          | 1.456                                                       | 2.984                                                                       | 2.147                                                       | 0.900                                                                       |
| HLK60_20130               | <i>yabI</i>          | -0.688                                                      | -3.558                                                                      | 0.265                                                       | -3.813                                                                      |

| Identifier                   | Annotation           | M1/5<br><i>rpsLK42R</i><br>$\Delta$ <i>clbR</i><br>(pBAD24) | M1/5<br><i>rpsLK42R</i><br>(pBAD24-<br><i>tetAp-clbR</i> -<br><i>rrnBt</i> ) | M1/5<br><i>rpsLK42R</i><br>$\Delta$ <i>clbQ</i><br>(pBAD24) | M1/5<br><i>rpsLK42R</i><br>(pBAD24-<br><i>tetAp-clbQ</i> -<br><i>rrnBt</i> ) |
|------------------------------|----------------------|-------------------------------------------------------------|------------------------------------------------------------------------------|-------------------------------------------------------------|------------------------------------------------------------------------------|
| HLK60_25335                  | hypothetical protein | 1.568                                                       | 2.340                                                                        | 1.611                                                       | 0.264                                                                        |
| HLK60_25435                  | <i>ssb</i>           | 0.917                                                       | 1.351                                                                        | 0.485                                                       | 2.593                                                                        |
| HLK60_25465                  | hypothetical protein | -0.727                                                      | 1.222                                                                        | 0.164                                                       | 2.023                                                                        |
| HLK60_00085                  | <i>ibpB</i>          | -0.790                                                      | 0.589                                                                        | 0.390                                                       | 3.683                                                                        |
| HLK60_22775                  | <i>malG</i>          | 0.425                                                       | 1.074                                                                        | -0.363                                                      | 2.082                                                                        |
| HLK60_10305                  | <i>mepM</i>          | 1.203                                                       | 2.056                                                                        | 1.289                                                       | 0.765                                                                        |
| HLK60_04320                  | <i>papA</i>          | -2.106                                                      | -0.456                                                                       | 0.107                                                       | -0.655                                                                       |
| HLK60_17685                  | <i>purK</i>          | -4.106                                                      | -1.157                                                                       | -0.630                                                      | -0.449                                                                       |
| HLK60_13375                  | <i>pyrF</i>          | 1.710                                                       | 1.766                                                                        | 2.070                                                       | 2.618                                                                        |
| HLK60_18785                  | <i>rpmJ</i>          | 1.748                                                       | 3.274                                                                        | 2.382                                                       | 0.809                                                                        |
| HLK60_11510                  | <i>sodB</i>          | -0.183                                                      | -2.041                                                                       | -0.136                                                      | -0.070                                                                       |
| HLK60_25530                  | <i>traV</i>          | 1.080                                                       | 1.922                                                                        | 0.485                                                       | 2.193                                                                        |
| HLK60_13485                  | <i>trpCF</i>         | 1.116                                                       | 1.702                                                                        | 1.458                                                       | 2.061                                                                        |
| HLK60_13480                  | <i>trpD</i>          | 1.019                                                       | 2.134                                                                        | 1.441                                                       | 2.116                                                                        |
| HLK60_13475                  | <i>trpE</i>          | 1.187                                                       | 2.600                                                                        | 1.388                                                       | 2.050                                                                        |
| HLK60_06100                  | <i>tyrA</i>          | 1.744                                                       | 1.950                                                                        | 2.100                                                       | 1.849                                                                        |
| HLK60_21480                  | <i>ulaE</i>          | 0.180                                                       | 0.544                                                                        | 0.070                                                       | 2.667                                                                        |
| HLK60_09915                  | <i>ybcL</i>          | -0.121                                                      | -2.105                                                                       | -0.231                                                      | -0.554                                                                       |
| HLK60_01370                  | <i>yhhY</i>          | 1.595                                                       | 2.470                                                                        | 1.864                                                       | 1.345                                                                        |
| HLK60_23835                  | <i>yihQ</i>          | 0.917                                                       | 0.544                                                                        | 0.485                                                       | 2.345                                                                        |
| HLK60_23805                  | <i>yihV</i>          | 0.180                                                       | 2.351                                                                        | 0.485                                                       | 0.667                                                                        |
| HLK60_09740                  | <i>zinT</i>          | 1.634                                                       | 2.912                                                                        | 1.975                                                       | 0.671                                                                        |
| HLK60_10300                  | <i>znuA</i>          | 1.248                                                       | 2.001                                                                        | 1.265                                                       | 0.731                                                                        |
| <b>De-regulated Proteins</b> |                      |                                                             |                                                                              |                                                             |                                                                              |
| HLK60_00030                  | YidA                 | 1.817                                                       | 2.217                                                                        | 1.802                                                       | 1.675                                                                        |
| HLK60_00080                  | IbpA                 | 0.045                                                       | 0.714                                                                        | 0.191                                                       | 3.588                                                                        |
| HLK60_00085                  | IbpB                 | -0.173                                                      | 0.347                                                                        | 0.162                                                       | 3.662                                                                        |
| HLK60_00300                  | Gmk                  | 1.616                                                       | 2.359                                                                        | 2.263                                                       | 1.789                                                                        |
| HLK60_01035                  | HdeB                 | -1.287                                                      | -2.219                                                                       | -1.823                                                      | -1.876                                                                       |
| HLK60_01060                  | HutX                 | 2.35                                                        | 2.756                                                                        | 2.337                                                       | 2.222                                                                        |
| HLK60_01135                  | UspA                 | 1.49                                                        | 2.199                                                                        | 2.004                                                       | 1.707                                                                        |
| HLK60_01340                  | YhhA                 | -1.806                                                      | -2.383                                                                       | -1.754                                                      | -2.431                                                                       |
| HLK60_01690                  | Rpe                  | 1.955                                                       | 2.169                                                                        | 2.037                                                       | 1.832                                                                        |
| HLK60_01695                  | Gph                  | 2.33                                                        | 2.621                                                                        | 2.132                                                       | 2.079                                                                        |
| HLK60_01700                  | TrpS                 | 3.851                                                       | 4.138                                                                        | 3.99                                                        | 3.645                                                                        |
| HLK60_01810                  | hypothetical protein | 5.648                                                       | 5.234                                                                        | 5.653                                                       | 4.43                                                                         |
| HLK60_01820                  | YheU                 | -1.433                                                      | -2.246                                                                       | -1.056                                                      | -2.146                                                                       |
| HLK60_02040                  | RpsQ                 | 4.543                                                       | 5.069                                                                        | 5.228                                                       | 4.665                                                                        |
| HLK60_02405                  | Rng                  | 2.314                                                       | 2.364                                                                        | 2.116                                                       | 2.341                                                                        |
| HLK60_02475                  | ZapE                 | 8.609                                                       | 11.652                                                                       | 7.697                                                       | 9.869                                                                        |
| HLK60_02490                  | SspA                 | 1.598                                                       | 1.69                                                                         | 2.442                                                       | 1.825                                                                        |
| HLK60_02570                  | RapZ                 | 3.638                                                       | 3.381                                                                        | 3.666                                                       | 3.451                                                                        |
| HLK60_02575                  | PtsN                 | 5.47                                                        | 5.808                                                                        | 4.822                                                       | 5.84                                                                         |

| Identifier  | Annotation           | M1/5                                                | M1/5                                                  | M1/5                                                | M1/5                                                  |
|-------------|----------------------|-----------------------------------------------------|-------------------------------------------------------|-----------------------------------------------------|-------------------------------------------------------|
|             |                      | <i>rpsLK42R</i><br>$\Delta$ <i>clbR</i><br>(pBAD24) | <i>rpsLK42R</i><br>(pBAD24- <i>tetAp-clbR-rrnBt</i> ) | <i>rpsLK42R</i><br>$\Delta$ <i>clbQ</i><br>(pBAD24) | <i>rpsLK42R</i><br>(pBAD24- <i>tetAp-clbQ-rrnBt</i> ) |
| HLK60_02620 | MlaF                 | 11.053                                              | 12.572                                                | 12.334                                              | 11.065                                                |
| HLK60_02770 | RpsO                 | 1.622                                               | 1.626                                                 | 2.075                                               | 1.645                                                 |
| HLK60_03010 | TdcF                 | 2.212                                               | 2.929                                                 | 3.084                                               | 2.666                                                 |
| HLK60_03040 | YhaJ                 | -1.326                                              | -2.085                                                | -1.399                                              | -1.588                                                |
| HLK60_03195 | EbgC                 | 2.693                                               | 3.888                                                 | 4.429                                               | 3.227                                                 |
| HLK60_04605 | YgfI                 | 14.106                                              | 14.365                                                | 14.276                                              | 13.784                                                |
| HLK60_04925 | LysA                 | 2.231                                               | 2.32                                                  | 2.076                                               | 2.129                                                 |
| HLK60_05115 | hypothetical protein | 1.573                                               | 1.719                                                 | 2.178                                               | 1.713                                                 |
| HLK60_05260 | FucO                 | 10.81                                               | 12.507                                                | 12.176                                              | 10.744                                                |
| HLK60_05285 | QueF                 | 3.057                                               | 2.584                                                 | 3.092                                               | 2.858                                                 |
| HLK60_05525 | IspF                 | -2.102                                              | -3.419                                                | -2                                                  | -2.884                                                |
| HLK60_05550 | RpoS                 | 10.935                                              | 12.901                                                | 10.814                                              | 10.503                                                |
| HLK60_05895 | ProV                 | 1.638                                               | 2.015                                                 | 2.148                                               | 1.742                                                 |
| HLK60_06030 | NadK                 | 11.572                                              | 11.514                                                | 11.479                                              | 11.678                                                |
| HLK60_06255 | RseB                 | -1.63                                               | -2.494                                                | -2.745                                              | -1.912                                                |
| HLK60_06610 | PurM                 | 3.233                                               | 3.226                                                 | 3.272                                               | 3.118                                                 |
| HLK60_06715 | AegA                 | -0.243                                              | -0.112                                                | -0.066                                              | 2.569                                                 |
| HLK60_06725 | YpfG                 | 4.894                                               | 5.559                                                 | 5.483                                               | 4.546                                                 |
| HLK60_06890 | CysA                 | 4.103                                               | 4.487                                                 | 4.317                                               | 4.203                                                 |
| HLK60_06935 | ZipA                 | 3.148                                               | 3.338                                                 | 3.751                                               | 2.705                                                 |
| HLK60_06940 | LigA                 | 1.959                                               | 2.21                                                  | 1.647                                               | 1.882                                                 |
| HLK60_07430 | YfcE                 | 14.227                                              | 14.598                                                | 14.197                                              | 13.131                                                |
| HLK60_07465 | HxpA                 | 4.955                                               | 5.67                                                  | 5.667                                               | 5.109                                                 |
| HLK60_07480 | AlaA                 | 2.782                                               | 2.678                                                 | 1.968                                               | 2.838                                                 |
| HLK60_07660 | NudI                 | 2.146                                               | 0.654                                                 | 2.118                                               | 1.506                                                 |
| HLK60_07710 | GlpB                 | 2.287                                               | 1.841                                                 | 2.746                                               | 1.819                                                 |
| HLK60_07825 | RcsB                 | 2.401                                               | 2.783                                                 | 2.508                                               | 2.383                                                 |
| HLK60_07975 | YejK                 | 2.288                                               | 2.535                                                 | 2.79                                                | 2.148                                                 |
| HLK60_08555 | Dcd                  | 4.343                                               | 4.348                                                 | 4.6                                                 | 4.173                                                 |
| HLK60_08680 | RfbB                 | 1.841                                               | 2.363                                                 | 1.83                                                | 1.955                                                 |
| HLK60_08685 | RfbD                 | 2.749                                               | 3.613                                                 | 3.046                                               | 2.884                                                 |
| HLK60_08690 | RfbA                 | 3.06                                                | 3.319                                                 | 3.222                                               | 3.351                                                 |
| HLK60_08725 | CpsG                 | 2.278                                               | 2.52                                                  | 2.391                                               | 2.574                                                 |
| HLK60_08745 | WzzB                 | 4.449                                               | 4.784                                                 | 4.434                                               | 4.263                                                 |
| HLK60_08765 | HisH                 | 1.398                                               | 2.75                                                  | 1.233                                               | 1.492                                                 |
| HLK60_08835 | YeeX                 | 2.242                                               | 2.01                                                  | 2.224                                               | 2.113                                                 |
| HLK60_08925 | hypothetical protein | 11.598                                              | 10.787                                                | 11.291                                              | 10.634                                                |
| HLK60_09120 | ClbR                 | 0.374                                               | 5.656                                                 | 0.655                                               | 0.545                                                 |
| HLK60_09130 | ClbC                 | nd                                                  | 13.256                                                | 11.4                                                | 10.511                                                |
| HLK60_09135 | ClbD                 | 1.084                                               | 2.232                                                 | 1.411                                               | 1.241                                                 |
| HLK60_09145 | ClbF                 | -3.876                                              | 4.455                                                 | 1.227                                               | 1.061                                                 |
| HLK60_09200 | ClbQ                 | 0.757                                               | 1.11                                                  | 0.472                                               | 7.738                                                 |

| Identifier         | Annotation           | M1/5                                       | M1/5                                                             | M1/5                                       | M1/5                                                             |
|--------------------|----------------------|--------------------------------------------|------------------------------------------------------------------|--------------------------------------------|------------------------------------------------------------------|
|                    |                      | <i>rpsLK42R</i><br><i>ΔclbR</i><br>+pBAD24 | <i>rpsLK42R</i><br>pBAD24-<br><i>tetAp-clbR-</i><br><i>rrnBt</i> | <i>rpsLK42R</i><br><i>ΔclbQ</i><br>+pBAD24 | <i>rpsLK42R</i><br>pBAD24-<br><i>tetAp-clbQ-</i><br><i>rrnBt</i> |
| <b>HLK60_09285</b> | YbtE                 | 3.522                                      | 3.591                                                            | 3.51                                       | 2.837                                                            |
| <b>HLK60_09820</b> | YedP                 | 12.047                                     | 11.734                                                           | 11.861                                     | 10.658                                                           |
| <b>HLK60_10090</b> | YecI                 | 4.126                                      | 4.065                                                            | 4.298                                      | 3.872                                                            |
| <b>HLK60_10115</b> | OtsA                 | 2.567                                      | 2.519                                                            | 2.217                                      | 2.17                                                             |
| <b>HLK60_10690</b> | MsrB                 | 8.078                                      | 8.115                                                            | 7.919                                      | 8.271                                                            |
| <b>HLK60_11185</b> | hypothetical protein | 1.67                                       | 2.006                                                            | 1.831                                      | 1.813                                                            |
| <b>HLK60_11190</b> | FtsH4                | -2.291                                     | -2.411                                                           | -1.626                                     | -1.144                                                           |
| <b>HLK60_11355</b> | MenI                 | 2.24                                       | 2.495                                                            | 2.815                                      | 2.442                                                            |
| <b>HLK60_11375</b> | SufC                 | 3.396                                      | 4.011                                                            | 3.655                                      | 2.927                                                            |
| <b>HLK60_11410</b> | FumD                 | -0.335                                     | -0.328                                                           | 0.499                                      | -2.232                                                           |
| <b>HLK60_11675</b> | YdgJ                 | 7.288                                      | 10.847                                                           | 11.969                                     | 10.315                                                           |
| <b>HLK60_11720</b> | UidC                 | 10.84                                      | 11.973                                                           | 11.238                                     | 11.385                                                           |
| <b>HLK60_11930</b> | Dcp                  | 2.071                                      | 2.277                                                            | 2.177                                      | 1.799                                                            |
| <b>HLK60_12230</b> | hypothetical protein | 8.692                                      | 8.962                                                            | 8.656                                      | 8.42                                                             |
| <b>HLK60_12660</b> | hypothetical protein | -2.785                                     | -4.59                                                            | nd                                         | nd                                                               |
| <b>HLK60_13010</b> | hypothetical protein | 1.693                                      | 2.208                                                            | 2.181                                      | 1.974                                                            |
| <b>HLK60_13445</b> | CobO                 | 3.674                                      | 3.224                                                            | 3.869                                      | 3.74                                                             |
| <b>HLK60_13525</b> | hypothetical protein | 11.474                                     | 12.082                                                           | 12.141                                     | 11.2                                                             |
| <b>HLK60_13820</b> | hypothetical protein | 4.456                                      | 4.565                                                            | 4.234                                      | 4.31                                                             |
| <b>HLK60_14080</b> | YchN                 | 3.466                                      | 3.675                                                            | 3.613                                      | 3.222                                                            |
| <b>HLK60_14185</b> | DhaL                 | 2.301                                      | 1.09                                                             | 1.413                                      | 1.945                                                            |
| <b>HLK60_14355</b> | YmgD                 | 2.145                                      | 2.512                                                            | 1.576                                      | 1.252                                                            |
| <b>HLK60_14565</b> | NudJ                 | 7.085                                      | 7.131                                                            | 6.926                                      | 7.231                                                            |
| <b>HLK60_14630</b> | hypothetical protein | 3.488                                      | 2.766                                                            | 3.082                                      | 2.86                                                             |
| <b>HLK60_14990</b> | LolE                 | 3.822                                      | 4.016                                                            | 4.398                                      | 3.981                                                            |
| <b>HLK60_15295</b> | YceI                 | 12.259                                     | 12.835                                                           | 12.257                                     | 12.489                                                           |
| <b>HLK60_15395</b> | YcdY                 | 2.854                                      | 3.001                                                            | 3.451                                      | 0.704                                                            |
| <b>HLK60_15515</b> | YmdF                 | -2.259                                     | -2.759                                                           | -3.518                                     | -1.847                                                           |
| <b>HLK60_15595</b> | CspG                 | 1.453                                      | 2.707                                                            | 2.363                                      | 2.214                                                            |
| <b>HLK60_15685</b> | YccU                 | 4.484                                      | 4.664                                                            | 4.356                                      | 4.042                                                            |
| <b>HLK60_15850</b> | LdtD                 | 4.767                                      | 5.611                                                            | 4.606                                      | 4.984                                                            |
| <b>HLK60_16545</b> | MoaC                 | -2.629                                     | -1.936                                                           | -2.128                                     | -2.429                                                           |
| <b>HLK60_16635</b> | YbhA                 | 2.588                                      | 2.853                                                            | 2.571                                      | 2.823                                                            |
| <b>HLK60_16685</b> | GalM                 | 1.92                                       | 2.741                                                            | 2.51                                       | 2.469                                                            |
| <b>HLK60_16785</b> | YbgC                 | 3.036                                      | 3.148                                                            | 2.939                                      | 2.856                                                            |
| <b>HLK60_16835</b> | SdhB                 | 0.785                                      | 0.929                                                            | 0.931                                      | 2.841                                                            |
| <b>HLK60_16880</b> | PxpA                 | 10.21                                      | 11.775                                                           | 11.038                                     | 11.13                                                            |
| <b>HLK60_17470</b> | Fes                  | 2.885                                      | 3.503                                                            | 3.403                                      | 2.793                                                            |
| <b>HLK60_17680</b> | PurE                 | 1.891                                      | 2.073                                                            | 1.839                                      | 1.922                                                            |
| <b>HLK60_17900</b> | Gsk                  | 3.196                                      | 2.607                                                            | 2.9                                        | 3.027                                                            |
| <b>HLK60_18100</b> | ClpP                 | 2.091                                      | 2.395                                                            | 2.099                                      | 2.186                                                            |
| <b>HLK60_18175</b> | YajL                 | 1.541                                      | 2.321                                                            | 1.929                                      | 1.357                                                            |
| <b>HLK60_18385</b> | IraP                 | 1.924                                      | 2.456                                                            | 2.129                                      | 1.855                                                            |

| Identifier          | Annotation           | M1/5                                       | M1/5                                                             | M1/5                                       | M1/5                                                             |
|---------------------|----------------------|--------------------------------------------|------------------------------------------------------------------|--------------------------------------------|------------------------------------------------------------------|
|                     |                      | <i>rpsLK42R</i><br><i>ΔclbR</i><br>+pBAD24 | <i>rpsLK42R</i><br>pBAD24-<br><i>tetAp-clbR-</i><br><i>rrnBt</i> | <i>rpsLK42R</i><br><i>ΔclbQ</i><br>+pBAD24 | <i>rpsLK42R</i><br>pBAD24-<br><i>tetAp-clbQ-</i><br><i>rrnBt</i> |
| <b>HLK60_18425</b>  | IprA                 | 2.609                                      | 2.725                                                            | 2.567                                      | 2.575                                                            |
| <b>HLK60_18570</b>  | YahO                 | -4.35                                      | -4.754                                                           | -5.681                                     | -5.62                                                            |
| <b>HLK60_19435</b>  | MetN                 | 3.334                                      | 3.631                                                            | 3.549                                      | 3.585                                                            |
| <b>HLK60_19650</b>  | ErpA                 | -1.264                                     | -1.563                                                           | -1.321                                     | -2.124                                                           |
| <b>HLK60_19720</b>  | PcnB                 | 2.967                                      | 3.251                                                            | 2.622                                      | 2.547                                                            |
| <b>HLK60_19765</b>  | PanB                 | 3.497                                      | 3.941                                                            | 3.46                                       | 3.381                                                            |
| <b>HLK60_19870</b>  | PdhR                 | 11.001                                     | 8.99                                                             | 12.011                                     | 10.076                                                           |
| <b>HLK60_20005</b>  | MurG                 | 4.409                                      | 4.446                                                            | 5.217                                      | 4.637                                                            |
| <b>HLK60_20015</b>  | MurD                 | 2.109                                      | 2.007                                                            | 2.331                                      | 2.055                                                            |
| <b>HLK60_20025</b>  | MurF                 | 4.864                                      | 3.312                                                            | 5.564                                      | 3.33                                                             |
| <b>HLK60_20030</b>  | MurE                 | 0.692                                      | 0.964                                                            | 0.686                                      | 2.505                                                            |
| <b>HLK60_20035</b>  | FtsI                 | 1.869                                      | 2.471                                                            | 2.207                                      | 1.864                                                            |
| <b>HLK60_20040</b>  | FtsL                 | 10.182                                     | 12.306                                                           | 11.802                                     | 9.358                                                            |
| <b>HLK60_20270</b>  | CaiA                 | 7.572                                      | 13.873                                                           | 10.616                                     | 9.894                                                            |
| <b>HLK60_20440</b>  | ThrB                 | 2.024                                      | 2.552                                                            | 3.308                                      | 2.407                                                            |
| <b>HLK60_20900</b>  | UxuA                 | 2.899                                      | 3.218                                                            | 2.84                                       | 3.029                                                            |
| <b>HLK60_21180</b>  | PepA                 | 1.804                                      | 2.124                                                            | 1.875                                      | 1.681                                                            |
| <b>HLK60_21205</b>  | RraB                 | 0.064                                      | 0.268                                                            | 3.284                                      | -1.199                                                           |
| <b>HLK60_21210</b>  | ArgF                 | 2.306                                      | 2.727                                                            | 2.516                                      | 2.384                                                            |
| <b>HLK60_21595</b>  | Rnr                  | 0.071                                      | 0.112                                                            | 0.071                                      | 3.467                                                            |
| <b>HLK60_21690</b>  | RsgA                 | 2.852                                      | 1.684                                                            | 2.872                                      | 2.217                                                            |
| <b>HLK60_21725</b>  | FrdB                 | -1.89                                      | -2.515                                                           | -4.851                                     | -2.047                                                           |
| <b>HLK60_21745</b>  | Blc                  | 2.207                                      | 2.148                                                            | 2.323                                      | 1.975                                                            |
| <b>HLK60_22150</b>  | hypothetical protein | 2.179                                      | 2.741                                                            | 2.194                                      | 2.134                                                            |
| <b>HLK60_22190</b>  | YdiA                 | 3.551                                      | 4.157                                                            | 3.074                                      | 8.014                                                            |
| <b>HLK60_22725</b>  | LexA                 | 13.849                                     | 14.026                                                           | 13.907                                     | 13.262                                                           |
| <b>HLK60_22820</b>  | YjbD                 | -0.895                                     | -1.444                                                           | -2.315                                     | -1.284                                                           |
| <b>HLK60_22980</b>  | YjaG                 | 2.883                                      | 3.341                                                            | 2.497                                      | 2.758                                                            |
| <b>HLK60_23140</b>  | BtuB                 | 2.61                                       | 1.811                                                            | 3.157                                      | 1.758                                                            |
| <b>HLK60_23200</b>  | ArgC                 | 1.619                                      | 1.85                                                             | 2.415                                      | 1.975                                                            |
| <b>HLK60_23240</b>  | FrwB                 | -1.661                                     | -2.314                                                           | -1.435                                     | -1.977                                                           |
| <b>HLK60_023370</b> | ZapB                 | 3.578                                      | 3.653                                                            | 3.95                                       | 3.288                                                            |
| <b>HLK60_23380</b>  | GlpK                 | 3.387                                      | 2.948                                                            | 3.178                                      | 3.279                                                            |
| <b>HLK60_24260</b>  | hypothetical protein | 2.167                                      | 2.583                                                            | 1.92                                       | 2.499                                                            |
| <b>HLK60_24305</b>  | CyaY                 | 11.889                                     | 11.993                                                           | 13.599                                     | 11.855                                                           |
| <b>HLK60_24315</b>  | HemC                 | 8.077                                      | 9.203                                                            | 8.858                                      | 8.571                                                            |
| <b>HLK60_24495</b>  | IlvG                 | 1.911                                      | 2.18                                                             | 1.748                                      | 2.052                                                            |
| <b>HLK60_24675</b>  | AtpC                 | 2.573                                      | 2.544                                                            | 2.574                                      | 2.445                                                            |
| <b>HLK60_24750</b>  | YieH                 | 6.191                                      | 6.227                                                            | 6.784                                      | 6.297                                                            |
| <b>HLK60_25190</b>  | hypothetical protein | 2.534                                      | 2.591                                                            | 1.468                                      | 2.424                                                            |
| <b>HLK60_24910</b>  | VirB11               | 3.213                                      | 3.441                                                            | 2.696                                      | 3.019                                                            |

De-regulated genes and proteins are listed with a fold-change relative to the wild type with a base mean  $\geq 10$  and a  $\log_2$ -fold change  $\leq -2$  or  $\geq +2$ . Indicated are changes in gene/protein expression relative to wild type strain M1/5 *rpsLK42R* (pBAD24).
