# Supplementary material for: ClbR Is the Key Transcriptional Activator of Colibactin Gene Expression in Escherichia coli
Source: PubMed Central journal article supplement (PMC7364221; doi:10.1128/msphere.00591-20), 2020-07-15
Supplement: mSphere.00591-20-st003-rev.pdf [file mSphere.00591-20-st003-rev.pdf]

**Table S3:** Oligonucleotides used as primers

| Primer | Sequence (5'-3')                                                               | Function                                                                           |
|--------|--------------------------------------------------------------------------------|------------------------------------------------------------------------------------|
| 1      | TTTCTAGAGAATAGGAACTTCTCGACGGAGGCCT<br>GTAGCAGTTGAGGAATTATAG                    | Cloning of pFuseA- <i>npt-5VNTR-clbRp-lux</i>                                      |
| 2      | GTTGGTATGTAAGCAAAAAGTTTCCAAATTTTCAT<br>GTTTCCCCCATCCTG                         | Cloning of pFuseA- <i>npt-5VNTR-clbRp-lux</i>                                      |
| 3      | GCGCGAATTCACCATGAGTAATATCAGTTTGTAT<br>TG                                       | Cloning of pBAD24- <i>clbQ-rrnBt</i>                                               |
| 4      | GCGCTCTAGAGCCATATCTATTGCTCCTTG                                                 | Cloning of pBAD24- <i>clbQ-rrnBt</i>                                               |
| 5      | CCATCGAATGGCCAGATGAT                                                           | Cloning of pBAD24- <i>tetAp-clbQ-rrnBt</i>                                         |
| 6      | GCGCACATGTAGCATTATCAGGGTTATTGTCT                                               | Cloning of pBAD24- <i>tetAp-clbQ-rrnBt</i>                                         |
| 7      | TGGAACAAACGCCAGCAACG                                                           | Cloning of pBAD24- <i>tetAp-clbQ-rrnBt</i>                                         |
| 8      | TTCACTTTTCTCTATCACTGATAG                                                       | Cloning of pBAD24- <i>tetAp-clbQ-rrnBt</i>                                         |
| 9      | GTGATAGAGAAAAGTGAAATGAGTAATATCAGTT<br>TGTATTGTTTG                              | Cloning of pBAD24- <i>tetAp-clbQ-rrnBt</i>                                         |
| 10     | TGCTCATGGTAGTTACTCCTTTTC                                                       | Cloning of <i>clbR</i> deletion                                                    |
| 11     | CAATCCTCATGTTTCCCCCATCCTGAATGGTATC                                             | Cloning of <i>clbR</i> deletion                                                    |
| 12     | GGGGGGAAACATGAGGATTGATATATTAATTGGA<br>C                                        | Cloning of <i>clbR</i> deletion                                                    |
| 13     | CGCCATTTAAATGAAGTTCCTATTCTCAATTCTG<br>CCCATTGACG                               | Cloning of <i>clbR</i> deletion                                                    |
| 14     | GCGCCACGTCGTACGTGCAAATATGGCAAACC                                               | Cloning of <i>clbR</i> deletion                                                    |
| 15     | GTATAGGAACTTCTCAATTCTGCCATTGACG                                                | Cloning of <i>clbR</i> deletion                                                    |
| 16     | GGGCAGAATTGAGAAGTTCCTATACTTTCTAGAG<br>AATAG                                    | Cloning of <i>clbR</i> deletion                                                    |
| 17     | CCTGTCTCTTGATCAGATCTTGATC                                                      | Cloning of <i>clbR</i> deletion                                                    |
| 18     | GGTGGTTGCTCTTCCGCAGATAATCTCATTCTGT<br>TAGC                                     | Cloning of <i>clbR</i> deletion/ pTXB1- <i>clbR</i>                                |
| 19     | GGTGGTCATATGGATAAGTTCAAAGAAAAAAACC                                             | Cloning of pTXB1- <i>clbR</i>                                                      |
| 20     | TGTTTCTCCATACCCGTTTTTTTTGGGCTAGCAGGA<br>GGAATTCACCATGGATAAGTTCAAAGAAAAAA<br>CC | Amplification of <i>clbR</i> for cloning into<br>pBAD24- <i>clbR</i>               |
| 21     | TTCTGTTTTATCAGACCGCTTCTGCGTTCTGATTT<br>AATCTGTATCATTAGATAATCTCATTCTGTAGC       | Amplification of <i>clbR</i> for cloning into<br>pBAD24- <i>clbR</i>               |
| 22     | GCTAACAGGAATGAGATTATCTAATGATACAGAT<br>TAAATCAGAACGC                            | Amplification of <i>rrnBt</i> for cloning into<br>pBAD24- <i>clbR</i>              |
| 23     | CAAAGAGTTTGTAGAAACGC                                                           | Amplification of <i>rrnBt</i> for cloning into<br>pBAD24- <i>clbR</i>              |
| 24     | TTTCGCCACCTCTGACTT                                                             | Amplification of <i>tetAp</i> for cloning into pGEM®-<br>T Easy- <i>tetAp-clbR</i> |
| 25     | GGTTTTTTTCTTTGAACTTATCCATTTCACTTTTCT<br>CTATCACTGATAGG                         | Amplification of <i>tetAp</i> for cloning into pGEM®-<br>T Easy- <i>tetAp-clbR</i> |
| 26     | ATGGATAAGTTCAAAGAAAAAAACC                                                      | Amplification of <i>clbR-rrnBt</i> from pBAD24- <i>clbR</i>                        |
| 27     | AGCATTTATCAGGGTTATTGTCT                                                        | Amplification of <i>clbR-rrnBt</i> from pBAD24- <i>clbR</i>                        |
| 28     | CCATCGAATGGCCAGATGAT                                                           | Fusion PCR to fuse the <i>tetAp</i> and <i>clbR-rrnBt</i><br>amplicons             |

| Primer | Sequence (5'-3')                                                                        | Function                                                                                          |
|--------|-----------------------------------------------------------------------------------------|---------------------------------------------------------------------------------------------------|
| 29     | CAAAAGAGTTTGTAGAAACGC                                                                   | Fusion PCR to fuse the <i>tetAp</i> and <i>clbR-rrnBt</i> amplicons                               |
| 30     | AATGCCATCTGGTATCACTTAAAGGTATTA<br>CAACTTTTTGTCTTTTTACCTCATATGAATATCCT<br>CCTTAGTTCC     | Cloning of M1/5 <i>rpsLK42R</i> $\lambda$ <i>attB</i> ::FRT                                       |
| 31     | AAGCCAATGCCAGCGCCAGACGGGAAACTGAAA<br>ATGTGTTACAGGTTGCTCCGGGCTATGTGTAGG<br>CTGGAGCTGCTC  | Cloning of M1/5 <i>rpsLK42R</i> $\lambda$ <i>attB</i> ::FRT                                       |
| 32     | TTCCCGTGATGGATAAATAAG                                                                   | Amplification <i>frr</i> promoter region                                                          |
| 33     | GTTACGAATCCTTGAAAACCT                                                                   | Amplification <i>frr</i> promoter region                                                          |
| 34     | TATGCAGCAGCGACATAAGG                                                                    | Fusing <i>luxA</i> with <i>frr</i> promoter region                                                |
| 35     | AAGTTTTCAAGGATTCGTAACATGAAATTTGGAA<br>ACTTTTTGCTTACATACCAAC                             | Fusing <i>luxA</i> with <i>frr</i> promoter region                                                |
| 36     | GACGGAAGATCACTTCGCAG                                                                    | Amplification of <i>cat</i> cassette                                                              |
| 37     | ACACCAGGATTTATTTATTCTGCGAAGTGATCTTC<br>CGTCTTCCCGTGATGGATAAATAAG                        | Fusing <i>luxA</i> overlap with <i>frr</i> promoter region,<br>adding <i>cat</i> cassette overlap |
| 38     | GAGATAACGGGTTTTTTTCTTTGAACTTATCCATG<br>TTTCCCCCATCCTGTTACGCCCCGCCCTGCCACT               | Scarless VNTR cloning                                                                             |
| 39     | GCCTGTAGCAGTTGAGGAATTATAGCATCAATAC<br>CGTCATCCTGCGGGACGCTAGCTTCTTCGTCTGTT<br>T          | Scarless VNTR cloning                                                                             |
| 40     | GAGATAACGGGTTTTTTTCTTTGAACTTAT                                                          | Scarless VNTR cloning                                                                             |
| 41     | GCCTGTAGCAGTTGAGGAATTATAG                                                               | Scarless VNTR cloning                                                                             |
| 42     | ACGAGTATCGAGATGGCACA                                                                    | Control PCR for chromosomal <i>clbR</i> deletion                                                  |
| 43     | ATGGCTCTTGTATCTATC                                                                      | Control PCR for chromosomal <i>clbR</i> deletion                                                  |
| 44     | GATAAGTTCAAAGAAAAAACCCTTATCTCTGC<br>GTGAAAGACAAGTATTGCGCATGCTGTGTAGGCT<br>GGAGCTGCTTC   | Chromosomal <i>clbR</i> deletion                                                                  |
| 45     | ATATGAAAATCAATATTATCGACGGCTCAGAAGT<br>GTCTAGATTATCCGTGGCGATCATATGAATATCCT<br>CCTTAGTTCC | Chromosomal <i>clbR</i> deletion                                                                  |
| 46     | ACCGTTGTATCGTAAATTCCTC                                                                  | Chromosomal <i>clbR</i> deletion                                                                  |
| 47     | GATTGTATTGAATTTCAATTAAC                                                                 | Chromosomal <i>clbR</i> deletion                                                                  |
| 48     | TGCTCATGGTAGTTACTCCTTTTC                                                                | General primer probe generation for EMSA with<br><i>clbB</i> upstream region                      |
| 49     | CATCCTGAATGGTATCTGTGTATC                                                                | 547-bp probe generation for EMSA with <i>clbB</i><br>upstream region (probe 1)                    |
| 50     | ATCTGTGTATCTGTTGTTTTGGCAG                                                               | 478-bp probe generation for EMSA with <i>clbB</i><br>upstream region (probe 2)                    |
| 51     | TTATGTAAATGGGAATTACGC                                                                   | 422-bp probe generation for EMSA with <i>clbB</i><br>upstream region (probe 3)                    |
| 52     | TGTATGTAATGCAATGACTTACATG                                                               | 355-bp probe generation for EMSA with <i>clbB</i><br>upstream region (probe 4)                    |
| 53     | AACATGTAATCAGAATATAAGG                                                                  | 294-bp probe generation for EMSA with <i>clbB</i><br>upstream region (probe 5)                    |
| 54     | CAATATGATTATATGAATACGC                                                                  | 238-bp probe generation for EMSA with <i>clbB</i><br>upstream region (probe 6)                    |
| 55     | ATGTAAATAATCTATAAATCC                                                                   | 171-bp probe generation for EMSA with <i>clbB</i><br>upstream region (probe 7)                    |

| <b>Primer</b> | <b>Sequence (5'-3')</b>     | <b>Function</b>                                                              |
|---------------|-----------------------------|------------------------------------------------------------------------------|
| 56            | GAGATTTTCCATGTAATAAGATGG    | 115-bp probe generation for EMSA with <i>clbB</i> upstream region (probe 8)  |
| 57            | TGAATACGCAATAAAAACTATACTTG  | 225-bp probe generation for EMSA with <i>clbB</i> upstream region (probe 9)  |
| 58            | AAAAACTATACTTGCGGATAGGTG    | 212-bp probe generation for EMSA with <i>clbB</i> upstream region (probe 10) |
| 59            | TGCGGATAGGTGTGCCATTTAG      | 200-bp probe generation for EMSA with <i>clbB</i> upstream region (probe 11) |
| 60            | CCATTTAGAATAATCATGTAAATAATC | 186-bp probe generation for EMSA with <i>clbB</i> upstream region (probe 12) |
| 61            | ACCGTTGTATCGTAAATTCCTC      | General primer probe generation for EMSA with <i>clbR</i> upstream region    |
| 62            | CTTTCACGCAGAGATAACGGG       | 176-bp probe generation for EMSA with <i>clbR</i> upstream region (probe 13) |
| 63            | GGTTTTTTTTCTTTGAACTTATC     | 157-bp probe generation for EMSA with <i>clbR</i> upstream region (probe 14) |
| 64            | CATGTTTCCCCCATCCTG          | 135-bp probe generation for EMSA with <i>clbR</i> upstream region (probe 15) |
| 65            | CATCCTGAATGGTATCTGTGTATC    | 123-bp probe generation for EMSA with <i>clbR</i> upstream region (probe 16) |
| 66            | CCGATTCATTAATGCAGCTG        | 229-bp probe generation for EMSA <i>lacZ</i> control                         |
| 67            | CCAGTCACGACGTTGTAATACG      | 229-bp probe generation for EMSA <i>lacZ</i> control                         |
| 68            | GTTGTCGCTGAAGCAACTGG        | RT-qPCR <i>gapA</i>                                                          |
| 69            | AGCGTTGGAAACGATGTCCT        | RT-qPCR <i>gapA</i>                                                          |
| 70            | CGTGGTGATAAAGTTGGGAC        | RT-qPCR <i>clbA</i>                                                          |
| 71            | CTCCACAGGAAGCTACTAAC        | RT-qPCR <i>clbA</i>                                                          |
| 72            | AGCGTGATTTCGTATTCCGAG       | RT-qPCR <i>clbR</i>                                                          |
| 73            | CCGTTATCTCTGCGTGAAAG        | RT-qPCR <i>clbR</i>                                                          |
| 74            | CGACGTCACACCTTTCAGCACG      | RT-qPCR <i>clbB</i>                                                          |
| 75            | TGCGGGGGTGATACGATAATCG      | RT-qPCR <i>clbB</i>                                                          |
| 76            | ATCGTCAAGCTGGGCGGAACTC      | RT-qPCR <i>clbQ</i>                                                          |
| 77            | AGTCCGCGTCTTTCGTGTGGTG      | RT-qPCR <i>clbQ</i>                                                          |
